# Supplementary material for: Assessment of the breadth of binding promiscuity of heme towards human proteins
Source: publisher site journal article supplement (doi:10.1515/hsz-2022-0226), 2022-10-18
Supplement: Supplementary file 1 [file j_hsz-2022-0226_suppl_001.xlsx]

## Sheet: Supplementary file 1
RefSeq mRNA Accession	Gene Symbol	File1 Signal	File2 Signal	Name	Predicted location	Protein function (UniProt)	Molecular function (UniProt)	Biological process (UniProt)	Ligand (UniProt)/Gene summary (Entrez)
NM_000282	PCCA	11343	10972.5	Propionyl-CoA carboxylase subunit alpha	Intracellular	This is one of the 2 subunits of the biotin-dependent propionyl-CoA carboxylase (PCC), a mitochondrial enzyme involved in the catabolism of odd chain fatty acids, branched-chain amino acids isoleucine, threonine, methionine, and valine and other metabolites. Propionyl-CoA carboxylase catalyzes the carboxylation of propionyl-CoA/propanoyl-CoA to D-methylmalonyl-CoA/(S)-methylmalonyl-CoA.	Ligase	n/a	Ligand (UniProt)i ATP-binding, Biotin, Magnesium, Metal-binding, Nucleotide-binding Gene summary (Entrez)i The protein encoded by this gene is the alpha subunit of the heterodimeric mitochondrial enzyme Propionyl-CoA carboxylase. PCCA encodes the biotin-binding region of this enzyme. Mutations in either PCCA or PCCB (encoding the beta subunit) lead to an enzyme deficiency resulting in propionic a…
NM_016230	CYB5R4	7477.5	2.5	Cytochrome b5 reductase 4	Intracellular	NADH-cytochrome b5 reductase involved in endoplasmic reticulum stress response pathway. Plays a critical role in protecting pancreatic beta-cells against oxidant stress, possibly by protecting the cell from excess buildup of reactive oxygen species (ROS). Reduces a variety of substrates in vitro, such as cytochrome c, feericyanide and methemoglobin	Oxidoreductase	n/a	Ligand (UniProt)i FAD, Flavoprotein, Heme, Iron, Metal-binding, NAD Gene summary (Entrez)i NCB5OR is a flavohemoprotein that contains functional domains found in both cytochrome b5 (CYB5A; MIM 613218) and CYB5 reductase (CYB5R3; MIM 613213)
NM_145251	STYX	4140	2	Serine/threonine/tyrosine interacting protein	Intracellular	Catalytically inactive phosphatase 1. Acts as a nuclear anchor for MAPK1/MAPK3 (ERK1/ERK2) 2. Modulates cell-fate decisions and cell migration by spatiotemporal regulation of MAPK1/MAPK3 (ERK1/ERK2) 3. By binding to the F-box of FBXW7, prevents the assembly of FBXW7 into the SCF E3 ubiquitin-protein ligase complex, and thereby inhibits degradation of its substrates 4.	n/a	N/a	The protein encoded by this gene is a pseudophosphatase, able to bind potential substrates but lacking an active catalytic loop. The encoded protein may be involved in spermiogenesis.
NM_015963	THAP4	3914.5	43	THAP domain containing 4	Intracellular, Membrane (different isoforms)	In vitro catalyzes the heme-based conversion of peroxynitrite into nitrate/NO3-. May be involved in the detoxification of peroxynitrite which is responsible for the nitration of L-free tyrosine 1.	DNA-binding, Isomerase	n/a	Ligand (UniProt)iHeme, Iron, Metal-binding, Zinc
NM_170676	MEIS2	3690	2	Meis homeobox 2	Intracellular	Involved in transcriptional regulation. Binds to HOX or PBX proteins to form dimers, or to a DNA-bound dimer of PBX and HOX proteins and thought to have a role in stabilization of the homeoprotein-DNA complex.	Activator, Developmental protein, DNA-binding	Transcription, Transcription regulation	This gene encodes a homeobox protein belonging to the TALE ('three amino acid loop extension') family of homeodomain-containing proteins. TALE homeobox proteins are highly conserved transcription regulators, and several members have been shown to be essential contributors to developmental programs.
NM_005368	MB	3401.5	1	Myoglobin	Intracellular	Serves as a reserve supply of oxygen and facilitates the movement of oxygen within muscles.	Muscle protein	Oxygen transport, Transport	Ligand (UniProt) Heme, Iron, Metal-binding Gene summary (Entrez)i This gene encodes a member of the globin superfamily and is predominantly expressed in skeletal and cardiac muscles. The encoded protein forms a monomeric globular haemoprotein that is primarily responsible for the storage and facilitated transfer of oxygen from the cell membrane to the mitochondria.
NM_016230	CYB5R4 *	3392	3.5	Cytochrome b5 reductase 4	Intracellular	NADH-cytochrome b5 reductase involved in endoplasmic reticulum stress response pathway. Plays a critical role in protecting pancreatic beta-cells against oxidant stress, possibly by protecting the cell from excess buildup of reactive oxygen species (ROS). Reduces a variety of substrates in vitro, such as cytochrome c, feericyanide and methemoglobin.	Oxidoreductase	n/a	Ligand (UniProt)i FAD, Flavoprotein, Heme, Iron, Metal-binding, NAD Gene summary (Entrez)i NCB5OR is a flavohemoprotein that contains functional domains found in both cytochrome b5 (CYB5A; MIM 613218) and CYB5 reductase (CYB5R3; MIM 613213)
NM_016495	TBC1D7	3308	17	TBC1 domain family member 7	Intracellular, Membrane	Component of the TSC-TBC complex, that contains TBC1D7 in addition to the TSC1-TSC2 complex and consists of the functional complex possessing GTPase-activating protein (GAP) activity toward RHEB in response to alterations in specific cellular growth conditions. The small GTPase RHEB is a direct activator of the protein kinase activity of mTORC1 and the TSC-TBC complex acts as a negative regulator…	GTPase activation	n/a	This gene encodes a member of the TBC-domain containing protein family. The encoded protein functions as a subunit of the tuberous sclerosis TSC1-TSC2 complex which plays a role in the regulation of cellular growth and differentiation.
NM_152243	CDC42EP1	3300	1	CDC42 effector protein 1	Intracellular	Probably involved in the organization of the actin cytoskeleton. Induced membrane extensions in fibroblasts.	n/a	n/a	Gene summary (Entrez) CDC42 is a member of the Rho GTPase family that regulates multiple cellular activities, including actin polymerization. The protein encoded by this gene is a CDC42 binding protein that mediates actin cytoskeleton reorganization at the plasma membrane. This protein is secreted and is primarily found in bone marrow.
NM_201998	SF1	3219	59	Splicing factor 1	Intracellular	Necessary for the ATP-dependent first step of spliceosome assembly. Binds to the intron branch point sequence (BPS) 5'-UACUAAC-3' of the pre-mRNA. May act as transcription repressor.	Repressor, RNA-binding	mRNA processing, mRNA splicing, Transcription, Transcription regulation	Ligand (UniProt) Metal-binding , Zinc Gene summary (Entrez)i This gene encodes a nuclear pre-mRNA splicing factor. The encoded protein specifically recognizes the intron branch point sequence at the 3' splice site, together with the large subunit of U2 auxiliary factor (U2AF), and is required for the early stages of spliceosome assembly. It also plays a role in nuclear pre-mRNA retention and tran…
NM_001032293	ZNF207	3126.5	2	Zinc finger protein 207	Intracellular	Kinetochore- and microtubule-binding protein that plays a key role in spindle assembly. ZNF207/BuGZ is mainly composed of disordered low-complexity regions and undergoes phase transition or coacervation to form temperature-dependent liquid droplets. Coacervation promotes microtubule bundling and concentrates tubulin, promoting microtubule polymerization and assembly of spindle and spindle matrix …	DNA-binding	Cell cycle, Cell division, Chromosome partition, Mitosis	Ligand (UniProt) Metal-binding, Zinc
NM_201403	MOB3C	3086	42	MOB kinase activator 3C	Intracellular	May regulate the activity of kinases.	n/a	n/a	Ligand (UniProt)i Metal-binding, Zinc Gene summary (Entrez)i The protein encoded by this gene is similar to the yeast Mob1 protein. Yeast Mob1 binds Mps1p, a protein kinase essential for spindle pole body duplication and mitotic checkpoint regulation. Alternatively spliced transcript variants encoding distinct isoforms have been observed. [provided by RefSeq, Jul 2008]
NM_178553	PRR30	2778.5	16.5	Proline rich 30	Intracellular	n/a	n/a	n/a	n/a
NM_199169	PMEPA1	2766.5	3	Prostate transmembrane protein, androgen induced 1	Intracellular, Membrane (different isoforms)	Functions as a negative regulator of TGF-beta signaling and thereby probably plays a role in cell proliferation, differentiation, apoptosis, motility, extracellular matrix production and immunosuppression.	Signal transduction inhibitor	Ubl conjugation pathway	Gene summary (Entrez)i This gene encodes a transmembrane protein that contains a Smad interacting motif (SIM). Expression of this gene is induced by androgens and transforming growth factor beta, and the encoded protein suppresses the androgen receptor and transforming growth factor beta signaling pathways though interactions with Smad proteins.
NM_002399	MEIS2*	2745.5	2	Meis homeobox 2	Intracellular	Involved in transcriptional regulation. Binds to HOX or PBX proteins to form dimers, or to a DNA-bound dimer of PBX and HOX proteins and thought to have a role in stabilization of the homeoprotein-DNA complex.	Activator, Developmental protein, DNA-binding	Transcription, Transcription regulation	Gene summary (Entrez)i This gene encodes a homeobox protein belonging to the TALE ('three amino acid loop extension') family of homeodomain-containing proteins. TALE homeobox proteins are highly conserved transcription regulators, and several members have been shown to be essential contributors to developmental programs.
NM_006399	BATF	2616	9.5	Basic leucine zipper ATF-like transcription factor	Intracellular	AP-1 family transcription factor that controls the differentiation of lineage-specific cells in the immune system: specifically mediates the differentiation of T-helper 17 cells (Th17), follicular T-helper cells (TfH), CD8(+) dendritic cells and class-switch recombination (CSR) in B-cells. Acts via the formation of a heterodimer with JUNB that recognizes and binds DNA sequence 5'- TGA[CG]TCA-3'.	Activator, DNA-binding, Repressor	Differentiation, Transcription, Transcription regulation	Gene summary (Entrez)i The protein encoded by this gene is a nuclear basic leucine zipper protein that belongs to the AP-1/ATF superfamily of transcription factors. The leucine zipper of this protein mediates dimerization with members of the Jun family of proteins. This protein is thought to be a negative regulator of AP-1/ATF transcriptional events.
NM_018335	ZNF839	2558.5	1	Zinc finger protein 839	Intracellular	n/a	n/a	n/a	Ligand (UniProt)i Metal-bindig, Zinc
NM_018457	PRR13	2557.5	34	Proline rich 13	Intracellular	Negatively regulates TSP1 expression at the level of transcription. This down-regulation was shown to reduce taxane-induced apoptosis. show less	n/a	Transcription, Transcription regulation	n/a
NM_023938	C1orf116	2524	27	Chromosome 1 open reading frame 116	Intracellular	Putative androgen-specific receptor.	Receptor	n/a	n/a
NM_004281	BAG3	2478	0	BAG cochaperone 3	Intracellular	Co-chaperone for HSP70 and HSC70 chaperone proteins. Acts as a nucleotide-exchange factor (NEF) promoting the release of ADP from the HSP70 and HSC70 proteins thereby triggering client/substrate protein release. Nucleotide release is mediated via its binding to the nucleotide-binding domain (NBD) of HSPA8/HSC70 where as the substrate release is mediated via its binding to the substrate-binding do…	Chaperone	Apoptosis	Gene summary (Entrez)i BAG proteins compete with Hip for binding to the Hsc70/Hsp70 ATPase domain and promote substrate release. All the BAG proteins have an approximately 45-amino acid BAG domain near the C terminus but differ markedly in their N-terminal regions. The protein encoded by this gene contains a WW domain in the N-terminal region and a BAG domain in the C-terminal region. The BAG dom…
NM_172390	NFATC1	2427	17	Nuclear factor of activated T cells 1	Intracellular	Plays a role in the inducible expression of cytokine genes in T-cells, especially in the induction of the IL-2 or IL-4 gene transcription. Also controls gene expression in embryonic cardiac cells. Could regulate not only the activation and proliferation but also the differentiation and programmed death of T-lymphocytes as well as lymphoid and non-lymphoid cells 1. Required for osteoclastogenesis …	Activator, DNA-binding, Repressor	Transcription, Transcription regulation	Gene summary (Entrez)i The product of this gene is a component of the nuclear factor of activated T cells DNA-binding transcription complex. This complex consists of at least two components: a preexisting cytosolic component that translocates to the nucleus upon T cell receptor (TCR) stimulation, and an inducible nuclear component.
NM_004454	ETV5	2367.5	3	ETS variant transcription factor 5	Intracellular	Binds to DNA sequences containing the consensus nucleotide core sequence 5'-GGAA.-3'.	DNA-binding	n/a	n/a
NM_138787	IFTAP	2353	3.5	Intraflagellar transport associated protein	Intracellular	Seems to play a role in ciliary BBSome localization, maybe through interaction with IFT-A complex.	n/a	n/a	Gene summary (Entrez)i This gene encodes a protein that was identified as a cellular interacting partner of non-structural protein 10 of the severe acute respiratory syndrome coronavirus (SARS-CoV). The encoded protein may function as a negative regulator of transcription.
NM_170603	RASGRP4	2330.5	28.5	RAS guanyl releasing protein 4	Intracellular	Functions as a cation- and diacylglycerol (DAG)-regulated nucleotide exchange factor activating Ras through the exchange of bound GDP for GTP. May function in mast cells differentiation.	Guanine-nucleotide releasing factor	Differentiation	Ligand (UniProt)i Calcium, Metal-binding, Zinc Gene summary (Entrez)i The protein encoded by this gene is a member of the Ras guanyl nucleotide-releasing protein (RasGRP) family of Ras guanine nucleotide exchange factors. It contains a Ras exchange motif, a diacylglycerol-binding domain, and two calcium-binding EF hands. This protein was shown to activate H-Ras in a cation-dependent manner in vit…
NM_032855	HSH2D	2231.5	2	Hematopoietic SH2 domain containing	Intracellular	May be a modulator of the apoptotic response through its ability to affect mitochondrial stability (By similarity). Adapter protein involved in tyrosine kinase and CD28 signaling.	n/a	n/a	T-cell activation requires 2 signals: recognition of antigen by the T-cell receptor and a costimulatory signal provided primarily by CD28 in naive T cells.
NM_002133	HMOX1	2231	0	Heme oxygenase 1	Intracellular, Membrane	Heme oxygenase cleaves the heme ring at the alpha methene bridge to form biliverdin. Biliverdin is subsequently converted to bilirubin by biliverdin reductase. Under physiological conditions, the activity of heme oxygenase is highest in the spleen, where senescent erythrocytes are sequestrated and destroyed. Exhibits cytoprotective effects since excess of free heme sensitizes cells to undergo apo…	Oxidoreductase	Apoptosis	Ligand (UniProt) Heme, Iron, Metal-binding Gene summary (Entrez)i Heme oxygenase, an essential enzyme in heme catabolism, cleaves heme to form biliverdin, which is subsequently converted to bilirubin by biliverdin reductase, and carbon monoxide, a putative neurotransmitter. Heme oxygenase activity is induced by its substrate heme and by various nonheme substances.
NM_134268	CYGB	2200.5	0	Cytoglobin	Intracellular	May have a protective function during conditions of oxidative stress. May be involved in intracellular oxygen storage or transfer.		Oxygen transport, Transport	Ligand (UniProt) Heme, Iron, Metal-binding Gene summary (Entrez)i This gene encodes a globin protein found in vertebrate cells. The encoded protein is described as a hexacoordinate hemoglobin which binds ligand differently from the pentacoordinate hemoglobins involved in oxygen transport, and may be involved in protection during oxidative stress.
NM_007005	TLE4	2175	3.5	TLE family member 4, transcriptional corepressor	Intracellular	Transcriptional corepressor that binds to a number of transcription factors. Inhibits the transcriptional activation mediated by PAX5, and by CTNNB1 and TCF family members in Wnt signaling.	Repressor	Transcription, Transcription regulation, Wnt signaling pathway	n/a
NM_005335	HCLS1	2172	97.5	Hematopoietic cell-specific Lyn substrate 1	Intracellular	Substrate of the antigen receptor-coupled tyrosine kinase. Plays a role in antigen receptor signaling for both clonal expansion and deletion in lymphoid cells. May also be involved in the regulation of gene expression.	n/a	n/a	n/a
NM_021639	GPBP1L1	2157	27.5	GC-rich promoter binding protein 1 like 1	Intracellular	Possible transcription factor.	DNA-binding	Transcription, Transcription regulation
NM_017772	TBC1D22B	2132.5	32	TBC1 domain family member 22B	Intracellular	May act as a GTPase-activating protein for Rab family protein(s).	GTPase activation	n/a	n/a
NM_014240	LIMD1	2117	2	LIM domains containing 1	Intracellular	Adapter or scaffold protein which participates in the assembly of numerous protein complexes and is involved in several cellular processes such as cell fate determination, cytoskeletal organization, repression of gene transcription, cell-cell adhesion, cell differentiation, proliferation and migration. Positively regulates microRNA (miRNA)-mediated gene silencing and is essential for P-body forma…	Repressor	RNA-mediated gene silencing, Transcription, Transcription regulation	Ligand (UniProt) Metal-binding, Zinc
NM_138333	PABIR1	2099.5	15	PPP2R1A-PPP2R2A-Interacting Phosphatase Regulator 1	Intracellular	n/a	n/a	n/a	Enables protein serine/threonine phosphatase inhibitor activity. Involved in mitotic G2/M transition checkpoint; positive regulation of cell growth; and positive regulation of proteasomal ubiquitin-dependent protein catabolic process.
NM_014667	VGLL4	2096	3.5	Vestigial like family member 4	Intracellular	May act as a specific coactivator for the mammalian TEFs.	n/a	Transcription, Transcription regulation	n/a
NM_005825	RASGRP2	2089.5	16.5	RAS guanyl releasing protein 2	Intracellular	Functions as a calcium- and DAG-regulated nucleotide exchange factor specifically activating Rap through the exchange of bound GDP for GTP.	Guanine-nucleotide releasing factor	n/a	Ligand (UniProt)i Calcium, Metal-binding, Zinc Gene summary (Entrez)i The protein encoded by this gene is a brain-enriched nucleotide exchanged factor that contains an N-terminal GEF domain, 2 tandem repeats of EF-hand calcium-binding motifs, and a C-terminal diacylglycerol/phorbol ester-binding domain. This protein can activate small GTPases, including RAS and RAP1/RAS3. The nucleotide exchange …
NM_003975	SH2D2A	2084.5	8.5	SH2 domain containing 2A	Intracellular	Could be a T-cell-specific adapter protein involved in the control of T-cell activation. May play a role in the CD4-p56-LCK-dependent signal transduction pathway. Could also play an important role in normal and pathological angiogenesis. Could be an adapter protein that facilitates and regulates interaction of KDR with effector proteins important to endothelial cell survival and proliferation.	Developmental protein	Angiogenesis, Differentiation	This gene encodes an adaptor protein thought to function in T-cell signal transduction.
NM_197967	BID	2069.5	1.5	BH3 interacting domain death agonist	Intracellular	The major proteolytic product p15 BID allows the release of cytochrome c.	n/a	Apoptosis	This gene encodes a death agonist that heterodimerizes with either agonist BAX or antagonist BCL2, and thus regulate apoptosis. The encoded protein is a member of the BCL-2 family of cell death regulators. It is a mediator of mitochondrial damage induced by caspase-8 (CASP8); CASP8 cleaves this encoded protein, and the COOH-terminal part translocates to mitochondria where it triggers cytochrome c…
NM_017856	GEMIN8	2004	-1	Gem nuclear organelle associated protein 8	Intracellular	The SMN complex plays a catalyst role in the assembly of small nuclear ribonucleoproteins (snRNPs), the building blocks of the spliceosome. Thereby, plays an important role in the splicing of cellular pre-mRNAs.	n/a	mRNA processing, mRNA splicing	The protein encoded by this gene is part of the SMN complex, which is necessary for spliceosomal snRNP assembly in the cytoplasm and pre-mRNA splicing in the nucleus. The encoded protein binds to both SMN1 and the GEMIN6/GEMIN7 heterodimer, mediating their interaction. This protein is found in nuclear Gemini of Cajal bodies (gems) and in the cytoplasm.
NM_015918	POP5	1998.5	24	POP5 homolog, ribonuclease P/MRP subunit	Intracellular	Component of ribonuclease P, a protein complex that generates mature tRNA molecules by cleaving their 5'-ends 1, 2. Also a component of the MRP ribonuclease complex, which cleaves pre-rRNA sequences 3.	Hydrolase, RNA-binding	rRNA processing, tRNA processing	n/a
NM_022720	DGCR8	1990.5	2.5	DGCR8 microprocessor complex subunit	Intracellular	Component of the microprocessor complex that acts as a RNA- and heme-binding protein that is involved in the initial step of microRNA (miRNA) biogenesis. Component of the microprocessor complex that is required to process primary miRNA transcripts (pri-miRNAs) to release precursor miRNA (pre-miRNA) in the nucleus.	RNA-binding	n/a	Ligand (UniProt) Heme, Iron, Metal-binding Gene summary (Entrez)i This gene encodes a subunit of the microprocessor complex which mediates the biogenesis of microRNAs from the primary microRNA transcript. The encoded protein is a double-stranded RNA binding protein that functions as the non-catalytic subunit of the microprocessor complex. This protein is required for binding the double-stranded R…
NM_007162	TFEB	1990.5	-0.5	Transcription factor EB	Intracellular	Transcription factor that acts as a master regulator of lysosomal biogenesis, autophagy, lysosomal exocytosis, lipid catabolism, energy metabolism and immune response. Specifically recognizes and binds E-box sequences (5'-CANNTG-3'); efficient DNA-binding requires dimerization with itself or with another MiT/TFE family member such as TFE3 or MITF. Involved in the cellular response to amino acid a…	Activator, DNA-binding	Adaptive immunity, Autophagy, Immunity, Transcription, Transcription regulation	Enables DNA-binding transcription factor activity; enzyme binding activity; and transcription cis-regulatory region binding activity. Involved in several processes, including cellular response to amino acid starvation; lysosome localization; and positive regulation of autophagy. Located in cytosol; lysosomal membrane; and nucleoplasm.
NM_153819	RASGRP2*	1954	24	RAS guanyl releasing protein 2	Intracellular	Functions as a calcium- and DAG-regulated nucleotide exchange factor specifically activating Rap through the exchange of bound GDP for GTP.	Guanine-nucleotide releasing factor	n/a	Ligand (UniProt)i Calcium, Metal-binding, Zinc Gene summary (Entrez)i The protein encoded by this gene is a brain-enriched nucleotide exchanged factor that contains an N-terminal GEF domain, 2 tandem repeats of EF-hand calcium-binding motifs, and a C-terminal diacylglycerol/phorbol ester-binding domain. This protein can activate small GTPases, including RAS and RAP1/RAS3. The nucleotide exchange …
NM_006647	NOXA1	1948	4.5	NADPH oxidase activator 1	Intracellular	Functions as an activator of NOX1, a superoxide-producing NADPH oxidase. Functions in the production of reactive oxygen species (ROS) which participate in a variety of biological processes including host defense, hormone biosynthesis, oxygen sensing and signal transduction.	n/a	n/a	This gene encodes a protein which activates NADPH oxidases, enzymes which catalyze a reaction generating reactive oxygen species. The encoded protein contains four N-terminal tetratricopeptide domains and a C-terminal Src homology 3 domain. Interaction between the encoded protein and proteins in the oxidase regulatory complex occur via the tetratricopeptide domains.
NM_004449	ERG	1948	8	ETS transcription factor ERG	Intracellular	Transcriptional regulator. May participate in transcriptional regulation through the recruitment of SETDB1 histone methyltransferase and subsequent modification of local chromatin structure.	DNA-binding	Transcription, Transcription regulation	This gene encodes a member of the erythroblast transformation-specific (ETS) family of transcriptions factors. All members of this family are key regulators of embryonic development, cell proliferation, differentiation, angiogenesis, inflammation, and apoptosis. The protein encoded by this gene is mainly expressed in the nucleus. It contains an ETS DNA-binding domain and a PNT (pointed) domain wh…
NM_172160	KCNAB1	1940.5	25	Potassium voltage-gated channel subfamily A member regulatory beta subunit 1	Intracellular	Cytoplasmic potassium channel subunit that modulates the characteristics of the channel-forming alpha-subunits. Modulates action potentials via its effect on the pore-forming alpha subunits. Promotes expression of the pore-forming alpha subunits at the cell membrane, and thereby increases channel activity.	Ion channel, Oxidoreductase, Voltage-gated channel	Ion transport, Potassium transport, Transport	Ligand (UniProt)i NADP, Potassium Gene summary (Entrez)i Potassium channels represent the most complex class of voltage-gated ion channels from both functional and structural standpoints. Their diverse functions include regulating neurotransmitter release, heart rate, insulin secretion, neuronal excitability, epithelial electrolyte transport, smooth muscle contraction, and cell volume.
NM_145061	SKA3	1930	2	Spindle and kinetochore associated complex subunit 3	Intracellular	Component of the SKA1 complex, a microtubule-binding subcomplex of the outer kinetochore that is essential for proper chromosome segregation. The SKA1 complex is a direct component of the kinetochore-microtubule interface and directly associates with microtubules as oligomeric assemblies. The complex facilitates the processive movement of microspheres along a microtubule in a depolymerization-cou…	n/a	Cell cycle, Cell division, Mitosis	This gene encodes a component of the spindle and kinetochore-associated protein complex that regulates microtubule attachment to the kinetochores during mitosis. The encoded protein localizes to the outer kinetechore and may be required for normal chromosome segregation and cell division.
NM_015532	POLR2M	1894	3.5	RNA polymerase II subunit M	Intracellular	Isoform 1 appears to be a stable component of the Pol II(G) complex form of RNA polymerase II (Pol II). Pol II synthesizes mRNA precursors and many functional non-coding RNAs and is the central component of the basal RNA polymerase II transcription machinery. Isoform 1 may play a role in the Mediator complex-dependent regulation of transcription activation.	n/a	Transcription [P0CAP2]	This gene encodes a subunit of a specific form of RNA polymerase II termed Pol II(G). The encoded protein may act as a negative regulator of transcriptional activation by the Mediator complex.
NM_019092	MINDY2	1889	0	MINDY lysine 48 deubiquitinase 2	Intracellular	Hydrolase that can remove 'Lys-48'-linked conjugated ubiquitin from proteins 1. Binds to polyubiquitin chains of different linkage types, including 'Lys-6', 'Lys-11', 'Lys-29', 'Lys-33', 'Lys-48' and 'Lys-63' 2. May play a regulatory role at the level of protein turnover 3	Hydrolase, Protease, Thiol protease	n/a	Ubl conjugation pathway
NM_181712	KANK4	1863.5	1	KN motif and ankyrin repeat domains 4	Intracellular	May be involved in the control of cytoskeleton formation by regulating actin polymerization.	n/a	n/a	n/a
NM_138565	CTTN	1852.5	751.5	Cortactin	Intracellular	Contributes to the organization of the actin cytoskeleton and cell shape. Plays a role in the formation of lamellipodia and in cell migration.	n/a	Endocytosis	The encoded protein is localized in the cytoplasm and in areas of the cell-substratum contacts. This gene has two roles: (1) regulating the interactions between components of adherens-type junctions and (2) organizing the cytoskeleton and cell adhesion structures of epithelia and carcinoma cells. During apoptosis, the encoded protein is degraded in a caspase-dependent manner. The aberrant regulat…
NM_006449	CDC42EP3	1841.5	5.5	CDC42 effector protein 3	Intracellular	Probably involved in the organization of the actin cytoskeleton. May act downstream of CDC42 to induce actin filament assembly leading to cell shape changes. Induces pseudopodia formation in fibroblasts		Cell shape	This gene encodes a member of a small family of guanosine triphosphate (GTP) metabolizing proteins that contain a CRIB (Cdc42, Rac interactive binding) domain. Members of this family of proteins act as effectors of CDC42 function. The encoded protein is involved in actin cytoskeleton re-organization during cell shape changes, including pseudopodia formation.
NM_156036	HOXB6	1839	12	Homeobox B6	Intracellular	n/a	Developmental protein, DNA-binding	Transcription, Transcription regulation	This gene is a member of the Antp homeobox family and encodes a protein with a homeobox DNA-binding domain. The encoded protein functions as a sequence-specific transcription factor that is involved in development, including that of lung and skin, and has been localized to both the nucleus and cytoplasm.
NM_145716	SSBP3	1824	1.5	Single stranded DNA binding protein 3	Intracellular	n/a	DNA-binding	Transcription, Transcription regulation	n/a
NM_032448	FAM120B	1807	3	Family with sequence similarity 120B	Intracellular	Functions as a transactivator of PPARG and ESR1. Functions in adipogenesis through PPARG activation.	Activator	n/a	Differentiation, Transcription, Transcription regulation
NM_003093	SNRPC	1803.5	-0.5	Small nuclear ribonucleoprotein polypeptide C	Intracellular	Component of the spliceosomal U1 snRNP, which is essential for recognition of the pre-mRNA 5' splice-site and the subsequent assembly of the spliceosome. SNRPC/U1-C is directly involved in initial 5' splice-site recognition for both constitutive and regulated alternative splicing. The interaction with the 5' splice-site seems to precede base-pairing between the pre-mRNA and the U1 snRNA. Stimulat…	Ribonucleoprotein, RNA-binding	Metal-binding, Zinc	Ligand (UniProt)i Metal-binding, Zinc. This gene encodes one of the specific protein components of the U1 small nuclear ribonucleoprotein (snRNP) particle required for the formation of the spliceosome. The encoded protein participates in the processing of nuclear precursor messenger RNA splicing.
NM_145253	UBALD1	1777	1	UBA like domain containing 1	Intracellular	n/a	n/a	n/a	N/a
NM_004527	MEOX1	1770.5	10.5	Mesenchyme homeobox 1	Intracellular	Mesodermal transcription factor that plays a key role in somitogenesis and is specifically required for sclerotome development. Required for maintenance of the sclerotome polarity and formation of the cranio-cervical joints. Binds specifically to the promoter of target genes and regulates their expression. Activates expression of NKX3-2 in the sclerotome. Activates expression of CDKN1A and CDKN2A…	Activator, Developmental protein, DNA-binding, Repressor	Transcription, Transcription regulation	This gene encodes a member of a subfamily of non-clustered, diverged, antennapedia-like homeobox-containing genes. The encoded protein may play a role in the molecular signaling network regulating somite development.
NM_145012	CCNY	1757	10	Cyclin Y	Intracellular	Positive regulatory subunit of the cyclin-dependent kinases CDK14/PFTK1 and CDK16. Acts as a cell-cycle regulator of Wnt signaling pathway during G2/M phase by recruiting CDK14/PFTK1 to the plasma membrane and promoting phosphorylation of LRP6, leading to the activation of the Wnt signaling pathway. Recruits CDK16 to the plasma membrane. Isoform 3 might play a role in the activation of MYC-mediat…	Cyclin	Cell cycle, Cell division, Wnt signaling pathway	Cyclins, such as CCNY, control cell division cycles and regulate cyclin-dependent kinases.
NM_003223	TFAP4	1749	6	Transcription factor AP-4	Intracellular	Transcription factor that activates both viral and cellular genes by binding to the symmetrical DNA sequence 5'-CAGCTG-3'.	Activator, DNA-binding	Transcription, Transcription regulation	Gene summary (Entrez)i Transcription factors of the basic helix-loop-helix-zipper (bHLH-ZIP) family contain a basic domain, which is used for DNA binding, and HLH and ZIP domains, which are used for oligomerization. Transcription factor AP4 activates both viral and cellular genes by binding to the symmetrical DNA sequence CAGCTG.
NM_031477	YPEL3	1746.5	22.5	Yippee like 3	Intracellular	Involved in proliferation and apoptosis in myeloid precursor cells.	n/a	n/a	Ligand (UniProt) Metal-bindng Zinc
NM_144679	TEPSIN	1722.5	2.5	TEPSIN adaptor related protein complex 4 accessory protein	Intracellular	Associates with the adapter-like complex 4 (AP-4) and may therefore play a role in vesicular trafficking of proteins at the trans-Golgi network.	n/a	n/a	n/a
NM_207332	ERICH1	1693	1	Glutamate rich 1	Intracellular	n/a	n/a	n/a	n/a
NM_001381	DOK1	1683.5	-0.5	Docking protein 1	Intracellular	DOK proteins are enzymatically inert adaptor or scaffolding proteins. They provide a docking platform for the assembly of multimolecular signaling complexes. DOK1 appears to be a negative regulator of the insulin signaling pathway. Modulates integrin activation by competing with talin for the same binding site on ITGB3.	n/a	n/a	The protein encoded by this gene is part of a signal transduction pathway downstream of receptor tyrosine kinases. The encoded protein is a scaffold protein that helps form a platform for the assembly of multiprotein signaling complexes. Several transcript variants encoding different isoforms have been found for this gene. [provided by RefSeq, Jan 2016]
NM_020762	SRGAP1	1682	73.5	SLIT-ROBO Rho GTPase activating protein 1	Intracellular	GTPase-activating protein for RhoA and Cdc42 small GTPases. Together with CDC42 seems to be involved in the pathway mediating the repulsive signaling of Robo and Slit proteins in neuronal migration. SLIT2, probably through interaction with ROBO1, increases the interaction of SRGAP1 with ROBO1 and inactivates CDC42.	GTPase activation	n/a	The protein encoded by this gene is a GTPase activator, working with the GTPase CDC42 to negatively regulate neuronal migration. The encoded protein interacts with the transmembrane receptor ROBO1 to inactivate CDC42.
NM_152377	C1orf87	1671	7.5	Chromosome 1 open reading frame 87	Intracellular	n/a	n/a	n/a	n/a
NM_023080	C8orf33	1669	77.5	Chromosome 8 open reading frame 33	Intracellular	n/a	n/a	n/a	n/a
NM_199188	LARP4	1655	49	La ribonucleoprotein 4	Intracellular	RNA binding protein that binds to the poly-A tract of mRNA molecules 1. Associates with the 40S ribosomal subunit and with polysomes 2. Plays a role in the regulation of mRNA translation 3. Plays a role in the regulation of cell morphology and cytoskeletal organization	RNA-binding	Protein biosynthesis	n/a
NM_005197	FOXN3	1652	6.5	Forkhead box N3	Intracellular	Acts as a transcriptional repressor. May be involved in DNA damage-inducible cell cycle arrests (checkpoints).	DNA-binding, Repressor	Cell cycle, Transcription, Transcription regulation	Gene summary (Entrez)i This gene is a member of the forkhead/winged helix transcription factor family. Checkpoints are eukaryotic DNA damage-inducible cell cycle arrests at G1 and G2.
NM_021218	INIP	1638.5	207	INTS3 and NABP interacting protein	Intracellular	Component of the SOSS complex, a multiprotein complex that functions downstream of the MRN complex to promote DNA repair and G2/M checkpoint. The SOSS complex associates with single-stranded DNA at DNA lesions and influences diverse endpoints in the cellular DNA damage response including cell-cycle checkpoint activation, recombinational repair and maintenance of genomic stability. Required for ef…	n/a	DNA damage, DNA repair	Gene summary (Entrez)i The protein encoded by this gene is a subunit of single-stranded DNA binding complexes that are important for maintaining genome stability. These complexes are involved in G2/M checkpoint control and homologous recombination repair.
NM_001025595	ARFIP1	1638	1	ADP ribosylation factor interacting protein 1	Intracellular	Plays a role in controlling biogenesis of secretory granules at the trans-Golgi network. Mechanisitically, binds ARF-GTP at the neck of a growing secretory granule precursor and forms a protective scaffold. Once the granule precursor has been completely loaded, active PRKD1 phosphorylates ARFIP1 and releases it from ARFs. In turn, ARFs induce fission. Through this mechanism, ensures proper secret…	n/a	n/a	n/a
NM_207506	SAMD12	1637.5	-1	Sterile alpha motif domain containing 12	Intracellular	n/a	n/a	n/a	n/a
NM_199190	LARP4*	1632.5	15.5	La ribonucleoprotein 4	Intracellular	RNA binding protein that binds to the poly-A tract of mRNA molecules 1. Associates with the 40S ribosomal subunit and with polysomes 2. Plays a role in the regulation of mRNA translation 3. Plays a role in the regulation of cell morphology and cytoskeletal organization	RNA-binding	Protein biosynthesis	n/a
NM_017735	TTC27	1630.5	0.5	Tetratricopeptide repeat domain 27	Intracellular	n/a	n/a	n/a	n/a
NM_172070	UBR3	1626.5	2	Ubiquitin protein ligase E3 component n-recognin 3	Intracellular, Membrane	E3 ubiquitin-protein ligase which is a component of the N-end rule pathway. Does not bind to proteins bearing specific N-terminal residues that are destabilizing according to the N-end rule, leading to their ubiquitination and subsequent degradation.	Transferase	Ubl conjugation pathway	Ligand (UniProt) Metal-binding, Zinc
NM_004349	RUNX1T1	1624	0	RUNX1 partner transcriptional co-repressor 1	Intracellular	Transcriptional corepressor which facilitates transcriptional repression via its association with DNA-binding transcription factors and recruitment of other corepressors and histone-modifying enzymes.	DNA-binding, Repressor	Transcription, Transcription regulation	Ligand (UniProt) Metal-binding, Zinc Gene summary (Entrez)i This gene encodes a member of the myeloid translocation gene family which interact with DNA-bound transcription factors and recruit a range of corepressors to facilitate transcriptional repression.
-
* indicates proteins which are present in two spots on the chip and both spots were detected positive.
